# Supplementary material for: Use of the Visual Analogue Parkinson’s Disease Sleep Scale in Nigeria.
Source: Research Square preprint supplement (doi:10.21203/rs.3.rs-6383451/v1), 2025-04-08
Supplement: Supplementary file 1 [file 2de1c39ef8212c75fbadd06b.docx]

**Supplementary Figure I: Parkinson’s disease sleep scale (PDSS) adapted from Chaudhuri K.R. et al (2002)(1)**
